# Supplementary material for: Simultaneous Voltammetric Determination of Ascorbic Acid, Paracetamol, and Caffeine Using Electrochemically Reduced Graphene-Oxide-Modified Electrode
Source: Hindawi journal article supplement (doi:10.1155/2018/5348016), 2018-08-27
Supplement: f1 [file 5348016.f1.pdf]

**TABLE****Table S1.** The factors and their level in Box-Behnken experimental design for AA

| Batch no. | Coded variable levels |                |                | Natural variable levels |                |                | Peak current of AA ( $\mu\text{A}$ ) |
|-----------|-----------------------|----------------|----------------|-------------------------|----------------|----------------|--------------------------------------|
|           | Z <sub>1</sub>        | Z <sub>2</sub> | Z <sub>3</sub> | Z <sub>1</sub>          | Z <sub>2</sub> | Z <sub>3</sub> |                                      |
| 1         | +1                    | +1             | 0              | 10                      | 12             | 0.08           | 2.25 $\pm$ 0.04 <sup>(a)</sup>       |
| 2         | 0                     | +1             | -1             | 6                       | 12             | 0.01           | 2.37 $\pm$ 0.01                      |
| 3         | 0                     | -1             | +1             | 6                       | 4              | 0.15           | 1.91 $\pm$ 0.01                      |
| 4         | 0                     | 0              | 0              | 6                       | 8              | 0.08           | 2.39 $\pm$ 0.04                      |
| 5         | 0                     | 0              | 0              | 6                       | 8              | 0.08           | 2.41 $\pm$ 0.04                      |
| 6         | -1                    | 0              | +1             | 2                       | 8              | 0.15           | 1.89 $\pm$ 0.02                      |
| 7         | +1                    | 0              | -1             | 10                      | 8              | 0.01           | 2.30 $\pm$ 0.02                      |
| 8         | 0                     | +1             | +1             | 6                       | 12             | 0.15           | 2.08 $\pm$ 0.01                      |
| 9         | 0                     | 0              | 0              | 6                       | 8              | 0.08           | 2.47 $\pm$ 0.01                      |
| 10        | 0                     | -1             | -1             | 6                       | 4              | 0.01           | 2.16 $\pm$ 0.01                      |
| 11        | +1                    | 0              | +1             | 10                      | 8              | 0.15           | 1.94 $\pm$ 0.01                      |
| 12        | +1                    | -1             | 0              | 10                      | 4              | 0.08           | 1.93 $\pm$ 0.01                      |
| 13        | -1                    | -1             | 0              | 2                       | 4              | 0.08           | 1.88 $\pm$ 0.01                      |
| 14        | -1                    | 0              | -1             | 2                       | 8              | 0.01           | 2.05 $\pm$ 0.01                      |
| 15        | -1                    | +1             | 0              | 2                       | 12             | 0.08           | 1.98 $\pm$ 0.00                      |

<sup>a</sup>Mean  $\pm$  Standard error ( $n = 4$ )

Table S1 shows the order of experiments according to Box-Behnken experimental design for AA. The rightmost column provides the values of peak current corresponding to each experiment.

**Table S2.** The factors and their level in Box-Behnken experimental design for PA

| Batch no. | Coded variable levels |       |       | Natural variable levels |       |       | Peak current of PA ( $\mu\text{A}$ ) |
|-----------|-----------------------|-------|-------|-------------------------|-------|-------|--------------------------------------|
|           | $Z_1$                 | $Z_2$ | $Z_3$ | $Z_1$                   | $Z_2$ | $Z_3$ |                                      |
| 1         | +1                    | +1    | 0     | 10                      | 12    | 0.08  | $4.48 \pm 0.28^a$                    |
| 2         | 0                     | +1    | -1    | 6                       | 12    | 0.01  | $4.95 \pm 0.06$                      |
| 3         | 0                     | -1    | +1    | 6                       | 4     | 0.15  | $3.21 \pm 0.19$                      |
| 4         | 0                     | 0     | 0     | 6                       | 8     | 0.08  | $5.29 \pm 0.31$                      |
| 5         | 0                     | 0     | 0     | 6                       | 8     | 0.08  | $5.18 \pm 0.26$                      |
| 6         | -1                    | 0     | +1    | 2                       | 8     | 0.15  | $3.13 \pm 0.18$                      |
| 7         | +1                    | 0     | -1    | 10                      | 8     | 0.01  | $4.71 \pm 0.28$                      |
| 8         | 0                     | +1    | +1    | 6                       | 12    | 0.15  | $3.79 \pm 0.25$                      |
| 9         | 0                     | 0     | 0     | 6                       | 8     | 0.08  | $5.42 \pm 0.11$                      |
| 10        | 0                     | -1    | -1    | 6                       | 4     | 0.01  | $4.09 \pm 0.26$                      |
| 11        | +1                    | 0     | +1    | 10                      | 8     | 0.15  | $3.30 \pm 0.19$                      |
| 12        | +1                    | -1    | 0     | 10                      | 4     | 0.08  | $3.30 \pm 0.13$                      |
| 13        | -1                    | -1    | 0     | 2                       | 4     | 0.08  | $3.13 \pm 0.18$                      |
| 14        | -1                    | 0     | -1    | 2                       | 8     | 0.01  | $3.66 \pm 0.24$                      |
| 15        | -1                    | +1    | 0     | 2                       | 12    | 0.08  | $3.41 \pm 0.22$                      |

<sup>a</sup>*Mean  $\pm$  Standard error ( $n = 4$ )*

Table S2 shows the order of experiments according to Box-Behnken experimental design for PA. The rightmost column provides the values of peak current corresponding to each experiment.

**Table S3.** The factors and their level in Box-Behnken experimental design for CA

| Batch no. | Coded variable levels |       |       | Natural variable levels |       |       | Peak current of CA ( $\mu\text{A}$ ) |
|-----------|-----------------------|-------|-------|-------------------------|-------|-------|--------------------------------------|
|           | $Z_1$                 | $Z_2$ | $Z_3$ | $Z_1$                   | $Z_2$ | $Z_3$ |                                      |
| 1         | +1                    | +1    | 0     | 10                      | 12    | 0.08  | $3.42 \pm 0.43^a$                    |
| 2         | 0                     | +1    | -1    | 6                       | 12    | 0.01  | $4.08 \pm 0.05$                      |
| 3         | 0                     | -1    | +1    | 6                       | 4     | 0.15  | $2.30 \pm 0.25$                      |
| 4         | 0                     | 0     | 0     | 6                       | 8     | 0.08  | $3.96 \pm 0.52$                      |
| 5         | 0                     | 0     | 0     | 6                       | 8     | 0.08  | $3.91 \pm 0.33$                      |
| 6         | -1                    | 0     | +1    | 2                       | 8     | 0.15  | $2.16 \pm 0.23$                      |
| 7         | +1                    | 0     | -1    | 10                      | 8     | 0.01  | $3.59 \pm 0.46$                      |
| 8         | 0                     | +1    | +1    | 6                       | 12    | 0.15  | $2.82 \pm 0.35$                      |
| 9         | 0                     | 0     | 0     | 6                       | 8     | 0.08  | $3.99 \pm 0.21$                      |
| 10        | 0                     | -1    | -1    | 6                       | 4     | 0.01  | $3.12 \pm 0.39$                      |
| 11        | +1                    | 0     | +1    | 10                      | 8     | 0.15  | $2.42 \pm 0.26$                      |
| 12        | +1                    | -1    | 0     | 10                      | 4     | 0.08  | $2.39 \pm 0.10$                      |
| 13        | -1                    | -1    | 0     | 2                       | 4     | 0.08  | $2.22 \pm 0.24$                      |
| 14        | -1                    | 0     | -1    | 2                       | 8     | 0.01  | $2.70 \pm 0.34$                      |
| 15        | -1                    | +1    | 0     | 2                       | 12    | 0.08  | $2.50 \pm 0.29$                      |

<sup>a</sup>Mean  $\pm$  Standard error ( $n = 4$ )

Table S3 shows the order of experiments according to Box-Behnken experimental design for CA. The rightmost column provides the values of peak current corresponding to each experiment.

**Table S4.** Estimated effects and coefficients for the models

| Term     | AA    |                 | PA    |                 | CA    |                 |
|----------|-------|-----------------|-------|-----------------|-------|-----------------|
|          | Coef  | <i>p</i> -value | Coef  | <i>p</i> -value | Coef  | <i>p</i> -value |
| Constant | 2.42  | 0.000           | 5.29  | 0.000           | 3.95  | 0.000           |
| $z_1$    | 0.08  | 0.000           | 0.31  | 0.000           | 0.28  | 0.000           |
| $z_2$    | 0.10  | 0.000           | 0.38  | 0.000           | 0.37  | 0.000           |
| $z_3$    | -0.13 | 0.000           | -0.48 | 0.000           | -0.45 | 0.000           |
| $z_1^2$  | -0.25 | 0.000           | -1.03 | 0.000           | -0.86 | 0.000           |
| $z_2^2$  | -0.16 | 0.000           | -0.68 | 0.000           | -0.45 | 0.000           |
| $z_3^2$  | -0.13 | 0.000           | -0.56 | 0.000           | -0.37 | 0.000           |
| $z_1z_2$ | 0.05  | 0.000           | 0.23  | 0.000           | 0.19  | 0.017           |
| $z_1z_3$ | -0.05 | 0.000           | -0.22 | 0.000           | -0.16 | 0.043           |
| $z_2z_3$ | -0.01 | 0.083           | -0.03 | 0.534           | -0.06 | 0.462           |

Table S4 presents estimated effects and coefficients of second-order polynomial equations. All the statistical and mathematical calculations were conducted using Minitab version 16.

**Table S5.** Effect of interferents (NaNO<sub>3</sub>) on peak current ErGO/GCE

| Interferent :<br>analyte (M/M) | AA                   |        | PA              |        | CA              |        |
|--------------------------------|----------------------|--------|-----------------|--------|-----------------|--------|
|                                | $I_p$                | RE (%) | $I_p$           | RE (%) | $I_p$           | RE (%) |
| 0 : 1                          | $2.3 \pm 0.07^{(*)}$ | 0.00   | $5.61 \pm 0.35$ | 0.00   | $3.07 \pm 0.30$ | 0.00   |
| 100 : 1                        | $2.21 \pm 0.09$      | -3.70  | $5.71 \pm 0.50$ | 1.73   | $3.21 \pm 0.24$ | 4.57   |
| 400 : 1                        | $2.40 \pm 0.11$      | 4.53   | $5.74 \pm 0.29$ | 2.18   | $3.20 \pm 0.13$ | 4.52   |
| 1000 : 1                       | $2.38 \pm 0.05$      | 3.45   | $5.72 \pm 0.13$ | 1.93   | $3.18 \pm 0.06$ | 3.70   |
| 1900 : 1                       | $2.41 \pm 0.01$      | 4.91   | $5.77 \pm 0.10$ | 2.82   | $3.18 \pm 0.18$ | 3.81   |
| 3100 : 1                       | $2.41 \pm 0.05$      | 4.93   | $5.68 \pm 0.42$ | 1.17   | $3.15 \pm 0.20$ | 2.62   |

<sup>(\*)</sup> Mean  $\pm$  Standard error ( $n = 4$ )

Table S5 shows that NaNO<sub>3</sub> does not interfere the peak currents of AA, PA and CA.

**Table S6.** Effect of interferents (K<sub>2</sub>CO<sub>3</sub>) on peak current ErGO/GCE

| Interferent :<br>analyte (M/M) | AA              |        | PA              |        | CA              |        |
|--------------------------------|-----------------|--------|-----------------|--------|-----------------|--------|
|                                | $I_p$           | RE (%) | $I_p$           | RE (%) | $I_p$           | RE (%) |
| 0 : 1                          | $2.41 \pm 0.02$ | 0.00   | $5.24 \pm 0.17$ | 0.00   | $4.14 \pm 0.16$ | 0.00   |
| 100 : 1                        | $2.40 \pm 0.01$ | -0.55  | $5.22 \pm 0.11$ | -0.55  | $3.99 \pm 0.21$ | -0.55  |
| 400 : 1                        | $2.41 \pm 0.04$ | -0.31  | $5.18 \pm 0.26$ | -0.31  | $4.01 \pm 0.33$ | -0.31  |
| 1000 : 1                       | $2.41 \pm 0.04$ | -0.31  | $5.18 \pm 0.26$ | -0.31  | $4.01 \pm 0.33$ | -0.31  |
| 1900 : 1                       | $2.4 \pm 0.04$  | -0.55  | $5.18 \pm 0.12$ | -0.55  | $4.04 \pm 0.18$ | -0.55  |
| 3100 : 1                       | $2.37 \pm 0.01$ | -1.81  | $5.15 \pm 0.06$ | -1.81  | $4.02 \pm 0.14$ | -1.81  |

Table S6 shows that K<sub>2</sub>CO<sub>3</sub> does not interfere the peak currents of AA, PA and CA.

**Table S7.** Effect of interferents (CaCl<sub>2</sub>) on peak current ErGO/GCE

| Interferent :<br>analyte (M/M) | AA              |        | PA              |        | CA              |        |
|--------------------------------|-----------------|--------|-----------------|--------|-----------------|--------|
|                                | $I_p$           | RE (%) | $I_p$           | RE (%) | $I_p$           | RE (%) |
| 0 : 1                          | $2.36 \pm 0.03$ | 0.00   | $5.09 \pm 0.15$ | 0.00   | $4.12 \pm 0.27$ | 0.00   |
| 100 : 1                        | $2.31 \pm 0.03$ | -2.22  | $5.02 \pm 0.26$ | -1.30  | $3.93 \pm 0.32$ | -4.67  |
| 400 : 1                        | $2.27 \pm 0.01$ | -3.85  | $5.01 \pm 0.10$ | -1.43  | $3.96 \pm 0.19$ | -3.99  |
| 1000 : 1                       | $2.28 \pm 0.02$ | -3.35  | $5.05 \pm 0.14$ | -0.67  | $3.99 \pm 0.20$ | -3.20  |
| 1900 : 1                       | $2.25 \pm 0.01$ | -4.44  | $4.98 \pm 0.22$ | -2.01  | $3.99 \pm 0.18$ | -3.12  |
| 3100 : 1                       | $2.26 \pm 0.02$ | -4.22  | $5.01 \pm 0.17$ | -1.49  | $3.96 \pm 0.19$ | -4.02  |

Table S7 shows that CaCl<sub>2</sub> does not interfere the peak currents of AA, PA and CA.

**Table S8.** Effect of interferents (NH<sub>4</sub>)<sub>2</sub>SO<sub>4</sub> on peak current ErGO/GCE

| Interferent :<br>analyte (M/M) | AA              |        | PA              |        | CA              |        |
|--------------------------------|-----------------|--------|-----------------|--------|-----------------|--------|
|                                | $I_p$           | RE (%) | $I_p$           | RE (%) | $I_p$           | RE (%) |
| 0 : 1                          | $2.18 \pm 0.06$ | 0.00   | $5.08 \pm 0.03$ | 0.00   | $3.37 \pm 0.14$ | 0.00   |
| 100 : 1                        | $2.09 \pm 0.04$ | -4.05  | $5.02 \pm 0.09$ | -1.17  | $3.40 \pm 0.06$ | 0.98   |
| 400 : 1                        | $2.17 \pm 0.03$ | -0.53  | $4.86 \pm 0.05$ | -4.37  | $3.33 \pm 0.12$ | -1.28  |
| 1000 : 1                       | $2.17 \pm 0.01$ | -0.36  | $4.96 \pm 0.14$ | -2.46  | $3.31 \pm 0.16$ | -1.77  |
| 1900 : 1                       | $2.13 \pm 0.08$ | -2.48  | $4.95 \pm 0.41$ | -2.59  | $3.25 \pm 0.24$ | -3.65  |
| 3100 : 1                       | $2.17 \pm 0.04$ | -0.72  | $4.97 \pm 0.28$ | -2.27  | $3.22 \pm 0.11$ | -4.47  |

Table S8 shows that (NH<sub>4</sub>)<sub>2</sub>SO<sub>4</sub> does not interfere the peak currents of AA, PA and CA.

**Table S9.** Effect of interferents (glucose) on peak current ErGO/GCE

| Interferent :<br>analyte (M/M) | AA              |        | PA              |        | CA              |        |
|--------------------------------|-----------------|--------|-----------------|--------|-----------------|--------|
|                                | $I_p$           | RE (%) | $I_p$           | RE (%) | $I_p$           | RE (%) |
| 0 : 1                          | $2.22 \pm 0.02$ | 0.00   | $4.71 \pm 0.04$ | 0.00   | $3.97 \pm 0.19$ | 0.00   |
| 10 : 1                         | $2.18 \pm 0.01$ | -1.75  | $4.71 \pm 0.33$ | 0.00   | $4.01 \pm 0.36$ | 0.87   |
| 40 : 1                         | $2.15 \pm 0.01$ | -2.86  | $4.86 \pm 0.15$ | 3.23   | $4.06 \pm 0.16$ | 2.07   |
| 100 : 1                        | $2.18 \pm 0.01$ | -1.86  | $4.56 \pm 0.15$ | -3.17  | $3.72 \pm 0.18$ | -6.27  |
| 190 : 1                        | $2.13 \pm 0.02$ | -3.95  | $4.64 \pm 0.18$ | -1.59  | $4.06 \pm 0.15$ | 2.28   |
| 310 : 1                        | $2.14 \pm 0.01$ | -3.38  | $4.69 \pm 0.09$ | -0.46  | $4.14 \pm 0.09$ | 4.16   |

Table S9 shows that glucose does not interfere the peak currents of AA, PA and CA.

**Table S10.** Effect of interferents (glutamic acid) on peak current ErGO/GCE

| Interferent :<br>analyte (M/M) | AA              |        | PA              |        | CA              |        |
|--------------------------------|-----------------|--------|-----------------|--------|-----------------|--------|
|                                | $I_p$           | RE (%) | $I_p$           | RE (%) | $I_p$           | RE (%) |
| 0 : 1                          | $2.12 \pm 0.02$ | 0.00   | $4.71 \pm 0.04$ | 0.00   | $3.97 \pm 0.19$ | 0.00   |
| 10 : 1                         | $2.18 \pm 0.00$ | 2.77   | $4.70 \pm 0.34$ | -0.24  | $3.81 \pm 0.37$ | -4.13  |
| 40 : 1                         | $2.15 \pm 0.01$ | 1.73   | $4.86 \pm 0.15$ | 3.23   | $4.06 \pm 0.16$ | 2.07   |
| 100 : 1                        | $2.18 \pm 0.01$ | 2.83   | $4.50 \pm 0.18$ | -4.50  | $4.03 \pm 0.20$ | 1.44   |
| 190 : 1                        | $2.13 \pm 0.02$ | 0.59   | $4.64 \pm 0.18$ | -1.59  | $4.06 \pm 0.10$ | 2.28   |
| 310 : 1                        | $2.14 \pm 0.01$ | 1.18   | $4.69 \pm 0.09$ | -0.46  | $4.14 \pm 0.09$ | 4.16   |

Table S10 shows that glutamic acid does not interfere the peak currents of AA, PA and CA.

**Table S11.** Effect of interferents (benzoic acid) on peak current ErGO/GCE

| Interferent :<br>analyte (M/M) | AA              |        | PA              |        | CA              |        |
|--------------------------------|-----------------|--------|-----------------|--------|-----------------|--------|
|                                | $I_p$           | RE (%) | $I_p$           | RE (%) | $I_p$           | RE (%) |
| 0 : 1                          | $1.89 \pm 0.03$ | 0.00   | $4.25 \pm 0.25$ | 0.00   | $3.45 \pm 0.47$ | 0.00   |
| 10 : 1                         | $1.93 \pm 0.06$ | 1.84   | $4.28 \pm 0.27$ | 0.78   | $3.6 \pm 0.46$  | 4.51   |
| 40 : 1                         | $1.94 \pm 0.05$ | 2.67   | $4.23 \pm 0.28$ | -0.50  | $3.55 \pm 0.63$ | 2.99   |
| 100 : 1                        | $1.92 \pm 0.03$ | 1.28   | $4.39 \pm 0.37$ | 3.29   | $3.54 \pm 0.54$ | 2.61   |
| 190 : 1                        | $1.95 \pm 0.03$ | 2.79   | $4.21 \pm 0.35$ | -0.99  | $3.55 \pm 0.53$ | 2.87   |
| 310 : 1                        | $1.91 \pm 0.02$ | 0.68   | $4.39 \pm 0.08$ | 3.38   | $3.6 \pm 0.06$  | 4.25   |

Table S11 shows that benzoic acid does not interfere the peak currents of AA, PA and CA.



## FIGURE

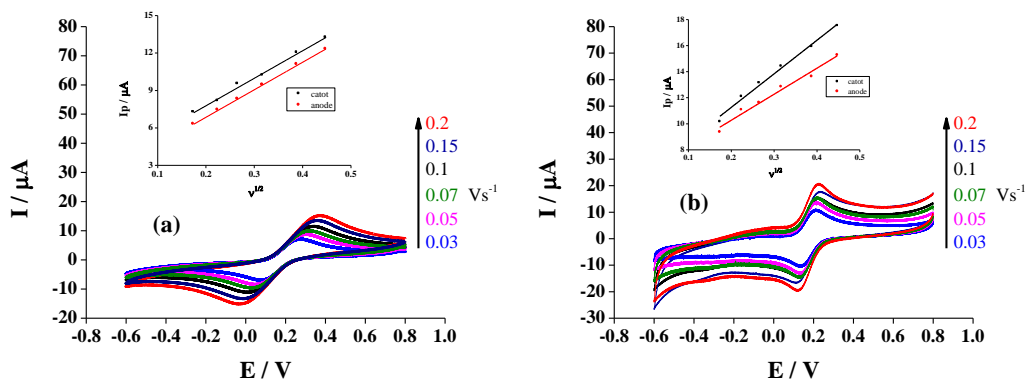

**Figure S1.** Cyclic voltammograms (CVs) in 1 mM  $\text{K}_3[\text{Fe}(\text{CN})_6]/\text{K}_4[\text{Fe}(\text{CN})_6]$  at various scan rates of GCE (a) and ErGO/GCE (b).

Figure S1 presents CVs in 1 mM  $\text{K}_3[\text{Fe}(\text{CN})_6]/\text{K}_4[\text{Fe}(\text{CN})_6]$  at various scan rates to calculate the effective surface area of electrodes.

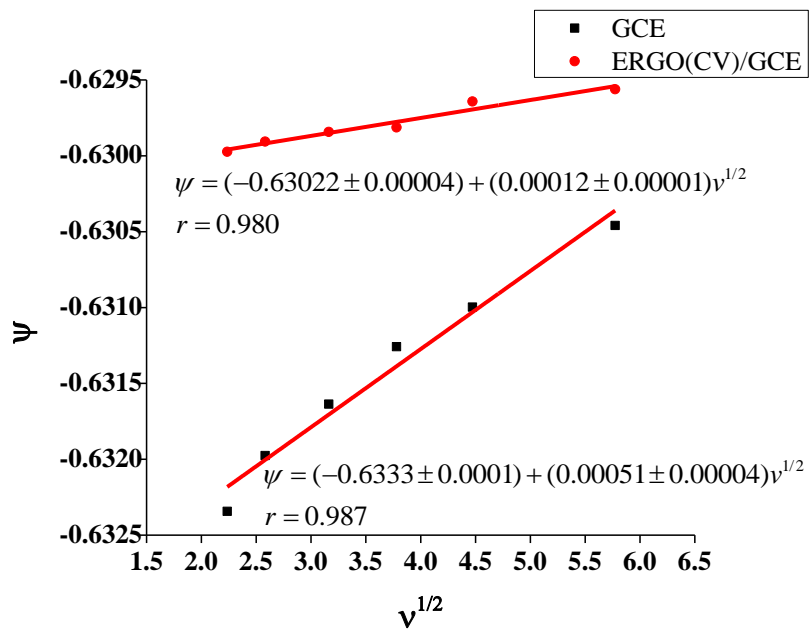

**Figure S2.** The plot of the kinetic parameter  $\psi$  and  $v^{1/2}$ .

Figure S2 presents the plot of the kinetic parameter  $\psi$  vs.  $v^{1/2}$  to obtain the heterogeneous electron transfer rate constant.

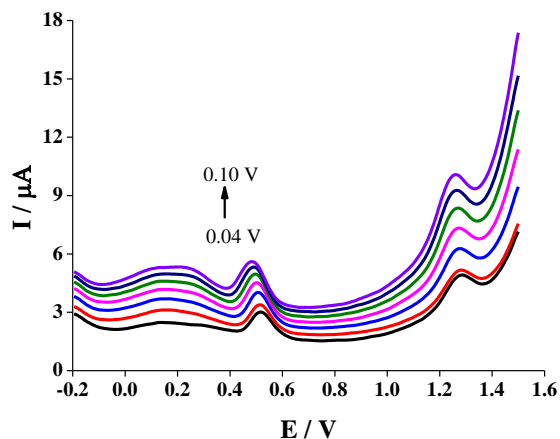

**Figure S3.** DP-ASV curves at different pulse amplitude ( $\Delta E$ ).

Figure S3 shows DP-ASV curves using the pulse amplitude in the range of 0.04 V to 0.10 V. The pulse amplitude of 0.06 V that provides a symmetric peak with low RSD (0.6 %).

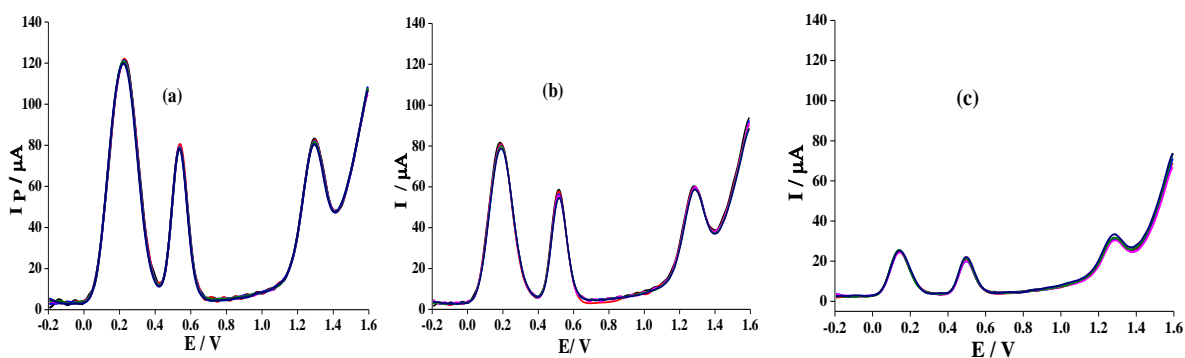

**Figure S4.** DP-ASV curves of  $C_{AA} = 100 \mu\text{M}$ ;  $C_{PA} = C_{CA} = 10 \mu\text{M}$  (a) and  $C_{AA} = 50 \mu\text{M}$ ,  $C_{PA} = C_{CA} = 5 \mu\text{M}$  (b) and  $C_{AA} = 10 \mu\text{M}$ ,  $C_{PA} = C_{CA} = 1 \mu\text{M}$  (c).

Figure S4 represents the DP-ASV curves of AA, PA and CA in which each signal was obtained by successive measurements for nine times.
